# Supplementary material for: Initiation of V(D)J Recombination by Dβ-Associated Recombination Signal Sequences: A Critical Control Point in TCRβ Gene Assembly
Source: PLOS journal article supplement (doi:10.1371/journal.pone.0004575), 2009-02-23
Supplement: S2 (10.1371/journal.pone.0004575.s002) [file journal.pone.0004575.s002]

**A**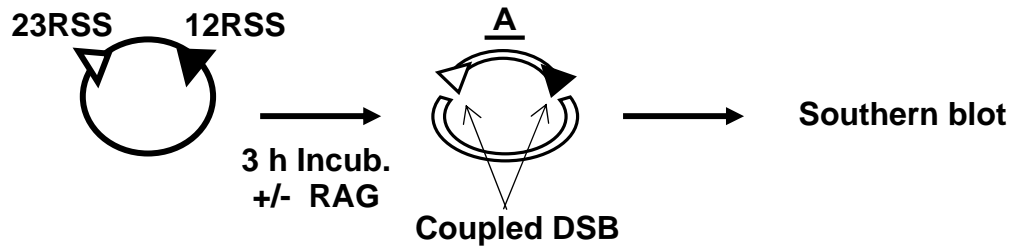**B**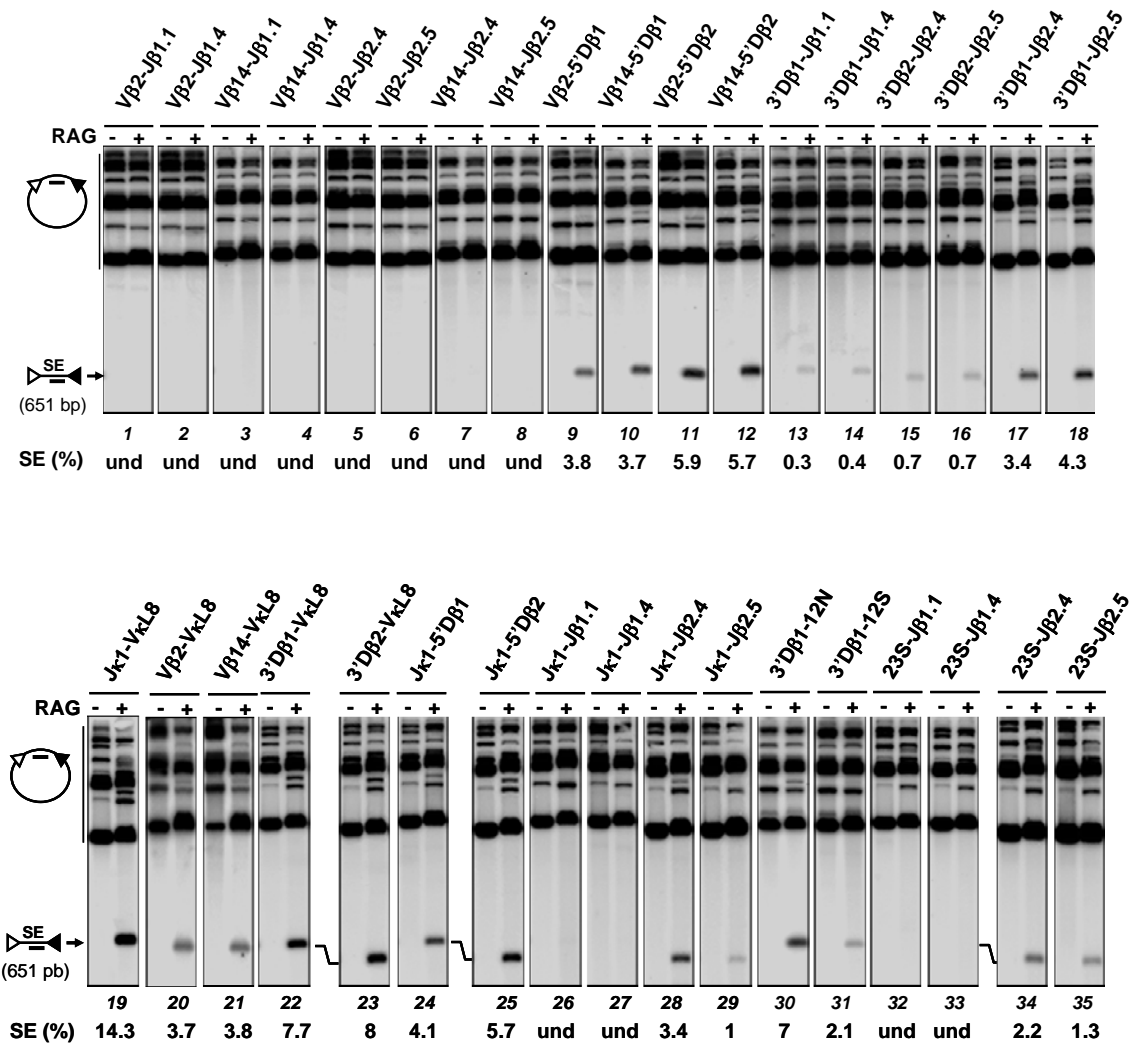

**Figure S2.** Pairwise modulation of RAG1/2-mediated coupled cleavage.

(A) *In vitro* DNA coupled-cleavage assay. As schematized on the left, the 23- and 12RSS-containing substrates were incubated for 3 h without (-) or with (+) the RAG1/2 extract. The cleaved DNA was then separated by gel electrophoresis and the signal end fragment (SE, 651 bp) was revealed by southern blotting. (B) Autoradiographic images from coupled-cleavage analysis of the indicated recombination. 12/23 RSS substrates were named according to the

gene segments flanking the 23- and 12RSS (see Figure S6 and Table S2 for substrates construction and DNA sequences of RSS). In the top panel (gels 1 to 18) DNA substrates contain a 12/23 RSS pair from TCR $\beta$  gene segments. In agreement with the B12/23 constraint, we did not detect any SE product when using V $\beta$ -J $\beta$  substrates (gels 1-8) while we readily detected coupled cleavage with V $\beta$ -5'D $\beta$  substrates (gels 9-12) and with 3'D $\beta$ -J $\beta$  substrates (gels 13-18). We remarked the variations in the amount of SE products when testing intra- (3'D $\beta$ 1-J $\beta$ 1 or 3'D $\beta$ 2-J $\beta$ 2 substrates) *vs.* inter- (3'D $\beta$ 1-J $\beta$ 2 substrates) locus combinations. In the bottom panel (gels 19 to 35) we exploited the consensual V $\kappa$ L8 12- and J $\kappa$ 1 23RSSs to decipher the sequences responsible for the B12/23 restriction. We found that each one of the V $\beta$  23RSSs, 3'D $\beta$  23RSSs and 5'D $\beta$  12RSSs interacted efficiently with the corresponding  $\kappa$  partner yielding significant levels (3.7% to 8%) of SE products (gels 20-25). Notably, in replacing the J $\beta$ 1.1 12RSS nonamer or spacer motifs by their corresponding elements from the V $\kappa$ L8 12RSS (12N and 12S RSS chimeras), we verified that the increase in cleavage efficiency of 3'D $\beta$ 1-V $\kappa$ L8 substrate (compared to the 3'D $\beta$ 1-J $\beta$ 1.1 substrate) depended on the nonamer and spacer sequences (gels 22, 30 and 31 versus gel 13). In parallel, we did not detect any cleavage of J $\kappa$ 1-J $\beta$ 1 substrate, this is probably linked to the suboptimal spacer sequence of J $\kappa$ 1 23RSS, as also inferred from the similar defect displayed by the 23S chimera (gels 26, 27, 32 and 33). However, when associated to the J $\beta$ 2.4- or J $\beta$ 2.5 12RSS, the J $\kappa$ 1 23- or 23S RSS had a less deleterious effect on coupled cleavage (gels 28, 29, 34 and 35) suggesting that pairing specificity is less stringent for the J $\beta$ 2 RSSs compared to J $\beta$ 1 RSSs.
