# Supplementary material for: Initiation of V(D)J Recombination by Dβ-Associated Recombination Signal Sequences: A Critical Control Point in TCRβ Gene Assembly
Source: PLOS journal article supplement (doi:10.1371/journal.pone.0004575), 2009-02-23
Supplement: S3 (10.1371/journal.pone.0004575.s003) [file journal.pone.0004575.s003]

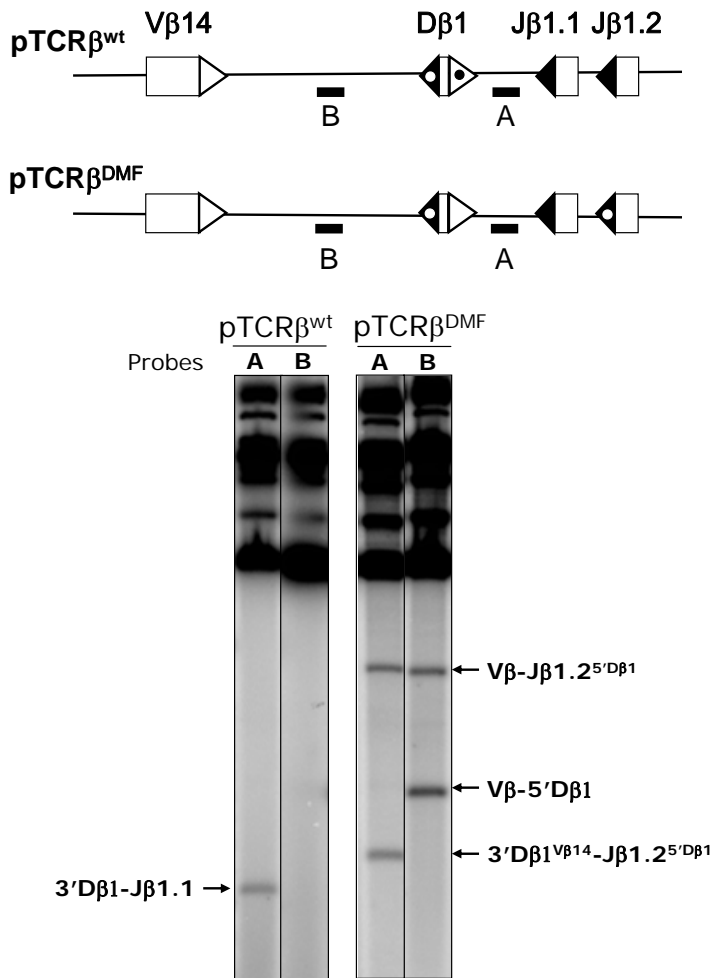

**Figure S3:** RAG1/2-mediated coupled cleavage of pTCRβ<sup>wt</sup> and pTCRβ<sup>DMF</sup> substrates.

12- and 23-RSS are respectively represented by black and white triangles. Dotted triangles correspond to Dβ1 12- and 23-RSS. In the pTCRβ<sup>DMF</sup> the 3'Dβ1 23RSS is replaced by the Vβ14 23RSS (3'Dβ1<sup>Vβ14</sup>) and the Jβ1.2 12RSS is replaced by the 5'Dβ1 12RSS (Jβ1.2<sup>5'Dβ1</sup>). The localization of probes A and B used to detect signal ends products are indicated. The coupled cleavage assays were performed as described in Fig. 5B and in the Materials and Methods section. For pTCRβ<sup>wt</sup> the 3'Dβ1-Jβ1.1 is detected. For pTCRβ<sup>DMF</sup>, the products of the various possible coupled cleavages are detected: Vβ-Jβ1.2<sup>5'Dβ1</sup>, the Vβ-5'Dβ1 and the 3'Dβ1<sup>Vβ14</sup>-Jβ1.2<sup>5'Dβ1</sup>. The 3'Dβ1<sup>Vβ14</sup>-Jβ1.2<sup>5'Dβ1</sup> coupled cleavage is at least as efficient than the 3'Dβ1-Jβ1.1 coupled cleavage of the pTCRβ<sup>wt</sup> substrate and therefore does not appear to be considerably slowed down. In pTCRβ<sup>DMF</sup> the Vβ-5'Dβ1 coupled cleavage is not impeded by the flanking Vβ14 23RSS and is in fact quite efficient, this is consistent with our *in vivo* results indicating that at TCRβ<sup>DMF</sup> minilocus some V-D rearrangements are detected before D-J rearrangements (Figure 6).
