# Supplementary material for: Initiation of V(D)J Recombination by Dβ-Associated Recombination Signal Sequences: A Critical Control Point in TCRβ Gene Assembly
Source: PLOS journal article supplement (doi:10.1371/journal.pone.0004575), 2009-02-23
Supplement: S7 (10.1371/journal.pone.0004575.s007) [file journal.pone.0004575.s007]

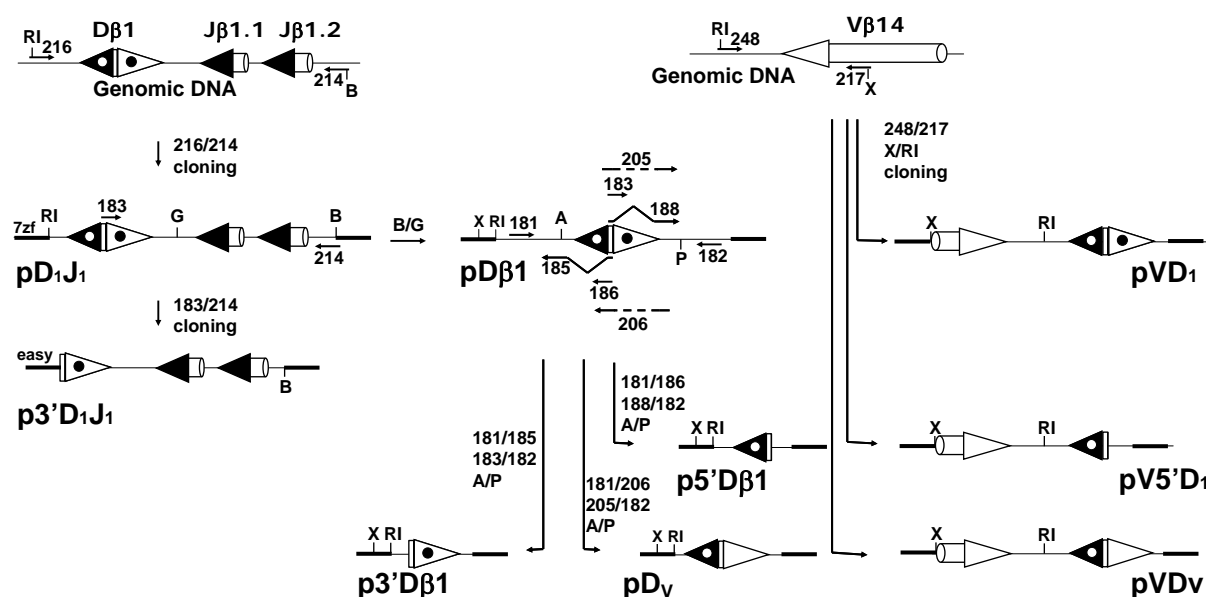

**Figure S7.** Cloning strategy to construct additional recombination substrates: [pD<sub>1</sub>J<sub>1</sub>; p3'D<sub>1</sub>J<sub>1</sub>; pDβ<sub>1</sub>; p5'Dβ<sub>1</sub>; pD<sub>v</sub>; p3'Dβ<sub>1</sub>; pVD<sub>1</sub>; pV5'D<sub>1</sub>; pVD<sub>v</sub>]. Genomic DNA encompassing the Dβ<sub>1</sub> to Jβ<sub>1.2</sub> region was amplified by PCR using primers #216 and #214 (see the primer list in **Table S4**) and subcloned into pGEM-7f using *Eco*RI and *Bam*HI sites, thus yielding substrate pD<sub>1</sub>J<sub>1</sub>. The PCR product resulting from amplification with primers #183 and #214 was subcloned into pGEMT-easy yielding substrate p3'D<sub>1</sub>J<sub>1</sub>. The *Bgl*III/*Bam*HI fragment excised from pD<sub>1</sub>J<sub>1</sub> yielded the pDβ<sub>1</sub> template. The latter template was mutated in a 2-steps PCR process: (i) 1<sup>st</sup> amplification used primers #181 and #186 or #188 and #182; (ii) 2<sup>nd</sup> amplification (from the resulting PCR product) used most 5' and 3' primers (#181 and #182). The latter product was digested and re-inserted into the *Acc*I/*Pst*I sites of the same vector to produce the p5'Dβ<sub>1</sub> substrate. A similar strategy was applied to generate constructs pD<sub>v</sub> and p3'Dβ<sub>1</sub> [PCR amplifications then used primers pairs #181 and #206 followed by #205 and #182 (pD<sub>v</sub>); or #181 and #185 followed by #183 and #182 (p3'Dβ<sub>1</sub>)]. A genomic fragment containing the Vβ<sub>14</sub> 23RSS was PCR amplified using primers #248 and #217. The resulting product was digested with *Eco*RI and *Xba*I and subcloned into pDβ<sub>1</sub>, p5'Dβ<sub>1</sub> or pD<sub>v</sub>, thus yielding substrates pVD<sub>1</sub>, pV5'D<sub>1</sub> or pVD<sub>v</sub>, respectively. RI, *Eco*RI; G, *Bgl*III; B, *Bam*HI; S, *Sac*I; X, *Xba*I; A, *Acc*I; P, *Pst*I.
